# Supplementary material for: Prognostic Value of Transaminases and Bilirubin Levels at Admission to Hospital on Disease Progression and Mortality in Patients with COVID-19—An Observational Retrospective Study
Source: MDPI journal article supplement (doi:10.3390/pathogens11060652), 2022-06-06
Supplement: s1 [file s1]

**PROGNOSTIC VALUE OF TRANSAMINASES AND BILIRUBIN LEVELS AT  
ADMISSION TO HOSPITAL ON DISEASE PROGRESSION AND MORTALITY IN  
PATIENTS WITH COVID-19 - AN OBSERVATIONAL RETROSPECTIVE STUDY.**

**SUPPLEMENTARY DATA**

**Supplementary Table S1: STROBE Statement—checklist of items that should be included in reports of observational studies**

|                          | Item No | Recommendation                                                                                                                                                                       | Page           |
|--------------------------|---------|--------------------------------------------------------------------------------------------------------------------------------------------------------------------------------------|----------------|
| Title and abstract       | 1       | (a) Indicate the study's design with a commonly used term in the title or the abstract                                                                                               | 1              |
|                          |         | (b) Provide in the abstract an informative and balanced summary of what was done and what was found                                                                                  | 3              |
| <b>Introduction</b>      |         |                                                                                                                                                                                      |                |
| Background/rationale     | 2       | Explain the scientific background and rationale for the investigation being reported                                                                                                 | 4              |
| Objectives               | 3       | State specific objectives, including any prespecified hypotheses                                                                                                                     | 4              |
| <b>Methods</b>           |         |                                                                                                                                                                                      |                |
| Study design             | 4       | Present key elements of study design early in the paper                                                                                                                              | 5              |
| Setting                  | 5       | Describe the setting, locations, and relevant dates, including periods of recruitment, exposure, follow-up, and data collection                                                      | 5              |
| Participants             | 6       | Give the eligibility criteria, and the sources and methods of selection of participants. Describe methods of follow-up                                                               | 5              |
| Variables                | 7       | Clearly define all outcomes, exposures, predictors, potential confounders, and effect modifiers. Give diagnostic criteria, if applicable                                             | 5              |
| Data sources/measurement | 8*      | For each variable of interest, give sources of data and details of methods of assessment (measurement). Describe comparability of assessment methods if there is more than one group | 5              |
| Bias                     | 9       | Describe any efforts to address potential sources of bias                                                                                                                            | 5              |
| Study size               | 10      | Explain how the study size was arrived at                                                                                                                                            | 5              |
| Quantitative variables   | 11      | Explain how quantitative variables were handled in the analyses. If applicable, describe which groupings were chosen and why                                                         | 6              |
| Statistical methods      | 12      | (a) Describe all statistical methods, including those used to control for confounding                                                                                                | 6              |
|                          |         | (b) Describe any methods used to examine subgroups and interactions                                                                                                                  | 6              |
|                          |         | (c) Explain how missing data were addressed                                                                                                                                          | 6              |
|                          |         | (d) <i>Cohort study</i> —If applicable, explain how loss to follow-up was addressed                                                                                                  | Not applicable |

| <b>Results</b>           |     |                                                                                                                                                                                                              | <b>Page</b>    |
|--------------------------|-----|--------------------------------------------------------------------------------------------------------------------------------------------------------------------------------------------------------------|----------------|
| Participants             | 13* | (a) Report numbers of individuals at each stage of study—eg numbers potentially eligible, examined for eligibility, confirmed eligible, included in the study, completing follow-up, and analysed            | 7              |
|                          |     | (b) Give reasons for non-participation at each stage                                                                                                                                                         | 7              |
|                          |     | (c) Consider use of a flow diagram                                                                                                                                                                           | Figure 1       |
| Descriptive data         | 14* | (a) Give characteristics of study participants (eg demographic, clinical, social) and information on exposures and potential confounders                                                                     | 7              |
|                          |     | (b) Indicate number of participants with missing data for each variable of interest                                                                                                                          | 7              |
|                          |     | (c) <i>Cohort study</i> —Summarise follow-up time (eg, average and total amount)                                                                                                                             | 7              |
| Outcome data             | 15* | <i>Cohort study</i> —Report numbers of outcome events or summary measures over time                                                                                                                          |                |
| Main results             | 16  | (a) Give unadjusted estimates and, if applicable, confounder-adjusted estimates and their precision (eg, 95% confidence interval). Make clear which confounders were adjusted for and why they were included | 7              |
|                          |     | (b) Report category boundaries when continuous variables were categorized                                                                                                                                    | 7              |
|                          |     | (c) If relevant, consider translating estimates of relative risk into absolute risk for a meaningful time period                                                                                             | Not applicable |
| Other analyses           | 17  | Report other analyses done—eg analyses of subgroups and interactions, and sensitivity analyses                                                                                                               | 7-8            |
| <b>Discussion</b>        |     |                                                                                                                                                                                                              |                |
| Key results              | 18  | Summarise key results with reference to study objectives                                                                                                                                                     | 8              |
| Limitations              | 19  | Discuss limitations of the study, taking into account sources of potential bias or imprecision. Discuss both direction and magnitude of any potential bias                                                   | 8              |
| Interpretation           | 20  | Give a cautious overall interpretation of results considering objectives, limitations, multiplicity of analyses, results from similar studies, and other relevant evidence                                   | 9              |
| Generalisability         | 21  | Discuss the generalisability (external validity) of the study results                                                                                                                                        | 9-10           |
| <b>Other information</b> |     |                                                                                                                                                                                                              |                |
| Funding                  | 22  | Give the source of funding and the role of the funders for the present study and, if applicable, for the original study on which the present article is based                                                | 11             |

**Supplementary Table S2:** Demographic and clinical data of patients included and excluded from the study.

|                                                                      | <b>Patients included in the study (CoviCamp database)<br/>N°(%): 1641 (79.9)</b> | <b>Patients excluded from the study (CoviCamp database)<br/>N°(%): 413 (20.1)</b> | <b>p-value</b> |
|----------------------------------------------------------------------|----------------------------------------------------------------------------------|-----------------------------------------------------------------------------------|----------------|
| <b>Males, N° (%)</b>                                                 | 1003 (61%)                                                                       | 264 (63%)                                                                         | 0.192          |
| <b>Age, years, mean (SD)</b>                                         | 62.35(16.14)                                                                     | 61.77(15.51)                                                                      | 0.512          |
| <b>Charlson comorbidity index, mean (SD)</b>                         | 3 (2.43)                                                                         | 2.64(2.33)                                                                        | 0.006          |
| <b>N° (%) of patients with hypertension</b>                          | 779 (47.5%)                                                                      | 171 (41.4%)                                                                       | 0.799          |
| <b>N° (%) of patients with cardiovascular disease</b>                | 467 (28.5%)                                                                      | 107 (25.9%)                                                                       | 0.984          |
| <b>N° (%) of patients with diabetes</b>                              | 347 (21.1%)                                                                      | 73 (17.6%)                                                                        | 0.433          |
| <b>N° (%) of patients with chronic kidney disease</b>                | 147 (9%)                                                                         | 31 (7.5%)                                                                         | 0.730          |
| <b>N° (%) of patients with chronic obstructive pulmonary disease</b> | 160 (9.8%)                                                                       | 52 (12.6%)                                                                        | 0.022          |
| <b>N° (%) of patients with chronic hepatopathy</b>                   | 63 (3.8%)                                                                        | 6 (1.4%)                                                                          | 0.053          |
| <b>N° (%) of patients with malignancy</b>                            | 112 (6.8%)                                                                       | 33(7.9%)                                                                          | 0.201          |
